# Supplementary material for: Determination of pentachlorophenol by anodic electrochemiluminescence of Ru(bpy)32+ based on nitrogen-doped graphene quantum dots as co-reactant
Source: Royal Society of Chemistry journal article supplement (doi:10.1039/c7ra10247j), 2017-01-01
Supplement: c7ra10247j1.pdf [file c7ra10247j1.pdf]

**Electronic Supplementary Information**

**Determination of pentachlorophenol by anodic electrochemiluminescence of Ru(bpy)<sub>3</sub><sup>2+</sup> based on nitrogen doped graphene quantum dots as co-reactant**

**Lijun Luo, Libo Li, Xixi Xu, Dong Liu, Jinyang Li, Kun Wang\* and Tianyan**

**You\***

*School of Agricultural Equipment Engineering, Institute of Agricultural Engineering,  
Jiangsu University, Zhenjiang, Jiangsu 212013, China.*

*\* Corresponding author. Fax/Tel: +86-511-88982992. E-mail: youty@ujs.edu.cn*

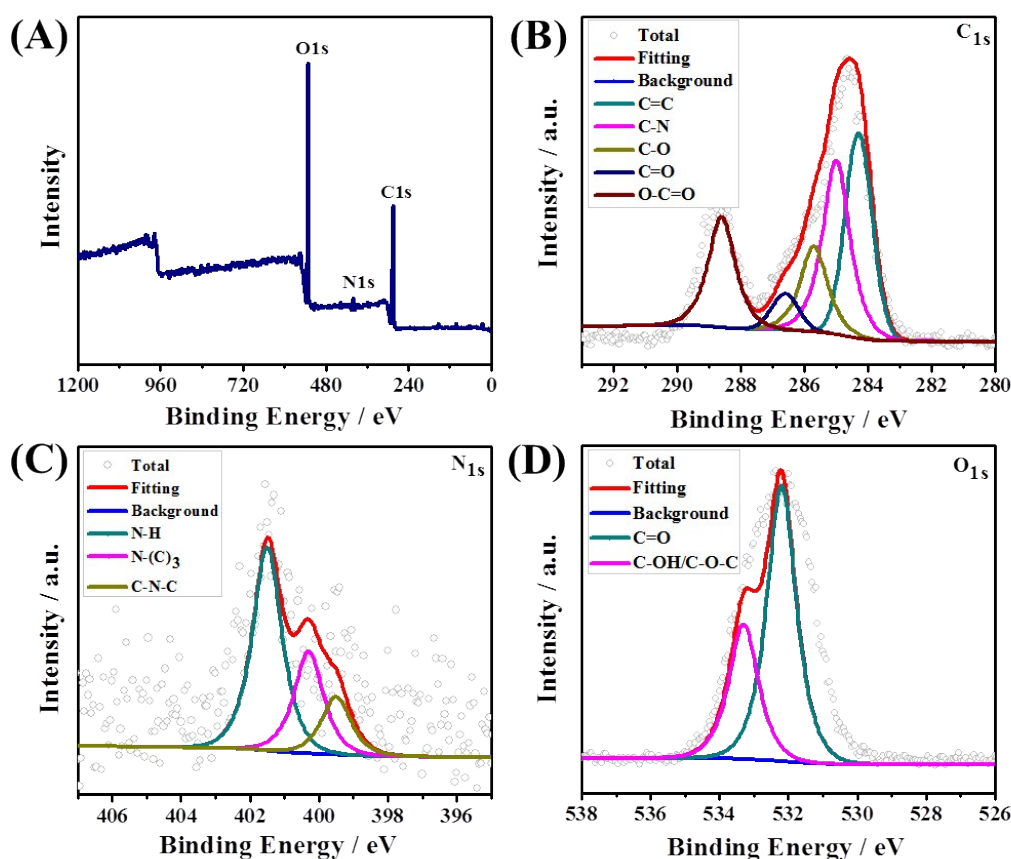

11

12 **Fig. S1.** (A) XPS survey spectrum of the as-prepared NGQDs; (B-D) high-resolution  
13 survey spectra of C<sub>1s</sub>, N<sub>1s</sub> and O<sub>1s</sub> of NGQDs.

14 XPS measurements were further carried out to inspect the chemical composition of  
15 the as-synthesized NGQDs. Fig. S1A illustrates three apparent peaks at 284.6, 401.4  
16 and 532.2 eV, corresponding to the C<sub>1s</sub>, N<sub>1s</sub> and O<sub>1s</sub>, respectively. Fig. S1B shows the  
17 expanded XPS spectrum of the C<sub>1s</sub> peaks at 284.3, 285, 285.7, 286.6 and 288.6 eV,  
18 which are associated with C=C, C-N, C-O, C=O and O-C=O bonds, respectively.<sup>1,2</sup>  
19 N<sub>1s</sub> spectrum (Fig. S1C) of NGQDs can be divided into three components located at  
20 399.5, 400.3 and 401.5 eV, which are assigned to C-N-C, N-(C)<sub>3</sub> and N-H,  
21 respectively.<sup>3</sup> The O<sub>1s</sub> core level spectrum (Fig. S1D) can be deduced at 532.2 and  
22 533.3 eV, corresponding to C=O and C-O-C/C-OH bonds. Comprehensively, XPS

23 observations agree well with FT-IR results, which further demonstrate that various  
 24 oxygen-containing functional groups distribute on the surface of NGQDs, leading to  
 25 excellent solubility of NGQDs in water.

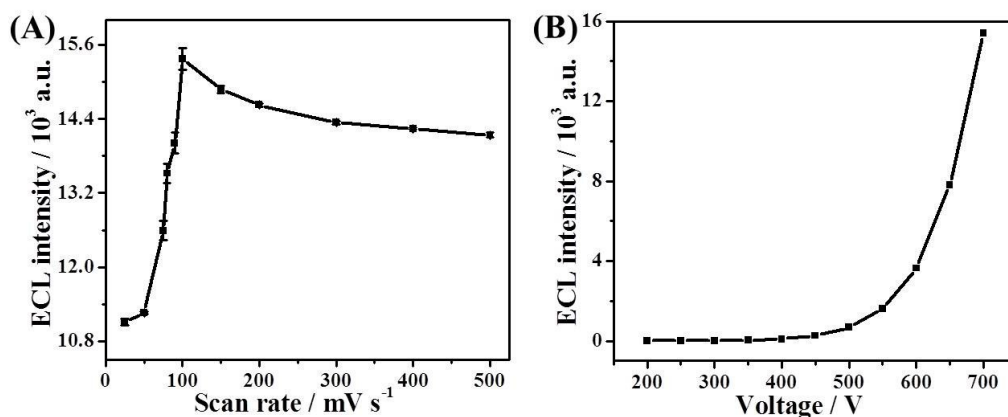

26  
 27 **Fig. S2.** Optimization of experimental parameters: (A) scan rate and (B) applied  
 28 voltage.

29 Finally, Fig. S2A shows influence of scan rate from 25 to 500  $\text{mV s}^{-1}$  on  $I_{\text{ECL}}$ . The  
 30 ECL intensity increases sharply and reaches the highest value at the scan rate of 100  
 31  $\text{mV s}^{-1}$ , and then decreases when the scanning rate exceeding 100  $\text{mV s}^{-1}$ . So the  
 32 optimum scan rate is chosen as 100  $\text{mV s}^{-1}$ . The effect of voltage applied on  $I_{\text{ECL}}$  (Fig.  
 33 S2B) suggests that the larger voltage, the higher ECL signal. However, when the high  
 34 voltage exceeds 700 V, the phenomenon occurs beyond the maximum range. Finally,  
 35 700 V is ultimately applied.

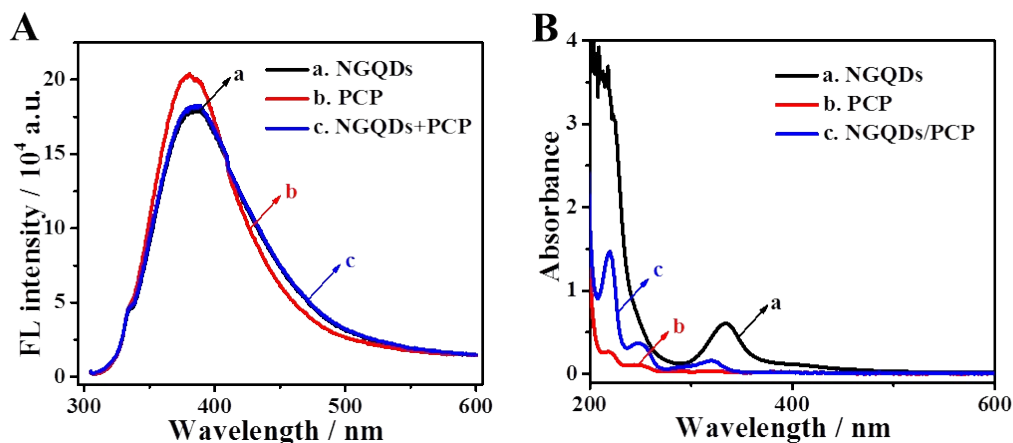

36

37 **Fig. S3.** (A) FL and (B) UV-Vis absorption spectra of NGQDs (a), PCP (b) and their  
38 mixture (c).

39 In order to confirm that there is no interaction between NGQDs and PCP, FL and  
40 UV-Vis spectroscopy are conducted. The FL spectra (Fig. S3A) exhibit that the  
41 emission of individual NGQDs features at 392 nm (line a), and the emission  
42 wavelength of alone PCP is located at 380 nm (line b). It can be seen from line c that  
43 the emission wavelength of the mixture of NGQDs and PCP is 385 nm, from which  
44 the interaction between NGQDs and PCP is very difficult to judge. Thus, UV-Vis  
45 properties of NGQDs, PCP and their mixture were investigated.

46 As can be seen from Fig. S3B, NGQDs display one characteristic band at 334 nm  
47 (line a), while individual PCP (line b) exhibits two adsorption peaks at 218 and 251  
48 nm, which are ascribed to the E-bands and B-bands, respectively.<sup>4</sup> While for their  
49 mixture system (line c), the adsorption bands are exactly the merging of their  
50 individuals, demonstrating no interaction occurs directly between NGQDs and PCP.

51

**Table S1**52     **Table S1.** Recovery studies of PCP in tap and river water samples (n=5).

| Sample      | Added<br>(pg mL <sup>-1</sup> ) | Found<br>(pg mL <sup>-1</sup> ) | Recovery<br>(%) | RSD (%)<br>(n=5) |
|-------------|---------------------------------|---------------------------------|-----------------|------------------|
| River water | 0                               | 11.22 ± 0.21                    | —               | 1.92             |
|             | 5                               | 16.66 ± 0.49                    | 102.7           | 4.57             |
|             | 10                              | 20.42 ± 0.57                    | 96.2            | 5.39             |
|             | 20                              | 30.90 ± 0.48                    | 99.0            | 4.56             |
| Tap water   | 0                               | Not detected                    | —               | —                |
|             | 5                               | 5.13 ± 0.15                     | 102.6           | 1.35             |
|             | 10                              | 9.77 ± 0.37                     | 97.7            | 3.38             |
|             | 20                              | 20.42 ± 0.11                    | 102.1           | 1.04             |

53

54

55 **References:**

- 56 1 Z. Yang, M. H. Xu, Y. Liu, F. J. He, F. G. Gao, Y. J. Su, H. Wei and Y. F. Zhang,  
57 Nanoscale, 2014, **6**, 1890-1895.
- 58 2 Q. H. Liang, W. J. Ma, Y. Shi, Z. Li and X. M. Yang, Carbon, 2013, **60**, 421-428.
- 59 3 S. Liu, J. Q. Tian, L. Wang, Y. W. Zhang, X. Y. Qin, Y. L. Luo, A. M. Asiri and  
60 X. P. Sun, Adv. Mater., 2012, **24**, 2037-2041.
- 61 4 M. Figueiredo-González, B. Cancho-Grande and J. Simal-Gándara, Food Chem.,  
62 2013, **140**, 217-224.
